# Supplementary material for: A Mesenchymal Tumor Cell State Confers Increased Dependency on the BCL-XL Anti-apoptotic Protein in Kidney Cancer
Source: PubMed Central journal article supplement (PMC9633392; doi:10.1158/1078-0432.ccr-22-0669), 2022-11-01

## SUPPLEMENTARY FIGURE LEGENDS

**Fig. S1. Pharmacological Characterization of BCL-X<sub>L</sub> Blockade in ccRCC cells.** (A and B) Percent cell death, as determined using XTT assays (A) and IC<sub>50</sub> values modeled using standard regression of log(dose) versus response (B), in the indicated ccRCC cell lines. In (A) data represents mean±S.D. n ≥ 3. (\*) represents IC<sub>50</sub> were calculated by extrapolation because cytotoxicity was < 50% even at the highest treated concentration. (C and D) IC<sub>50</sub> values modeled using standard regression of log(dose) versus response, from at least 3 independent measurements in the indicated ccRCC cell lines, either using the BCL-X<sub>L</sub> inhibitor A1331852 (C) or the BCL-2 inhibitor ABT-199 (D). ND represents Not Determined, because the cytotoxicity was below 50% death, relative to untreated control. (E) Cell viability, as measured by CellTiter-Glo in the indicated cell lines upon treatment with A-1331852 or ABT-199 for 3 days. Concentrations are presented as log<sub>10</sub>. (F) Structural model of BCL-X<sub>L</sub> in complex with the (A-1331852-precursor) tetrahydroisoquinoline-pyridine backbone (PDB: 6VWC), generated using ChimeraX. (G) Immunoblot analysis of UMRC-2 cells that were lentivirally transduced to express sh499-resistant versions of either wild-type BCL-X<sub>L</sub>, the indicated BCL-X<sub>L</sub> mutants, or empty vector (VEC). (H) Crystal violet staining of the indicated cells that were first transduced as in (G), and then were lentivirally transduced to express either BCL-X<sub>L</sub> targeting shRNA (sh499) or a non-targeting control (shCON), and grown in the presence of puromycin for 7 days. (I) IC<sub>50</sub> values measured from three independent replicates of UMRC-6 cells expressing either wild-type BCL-X<sub>L</sub>, the indicated BCL-X<sub>L</sub> mutants, or empty vector (VEC), as indicated, and then cultured in the presence of A-1331852 for 3 days. (J) Crystal violet staining of UMRC-6 cells, as described in (I), that were cultured in the

presence of 2  $\mu$ M A-1331852 for 10 days.

**Fig. S2. BCL-X<sub>L</sub> Inhibition Chemosensitizes ccRCCs to Chemotherapeutics.** (A, C, E, G, I, and K) Mean synergism score calculated across four independent models (ZIP, HSA, Loewe, Bliss), using the SynergyFinder package, for 5-fluorouracil (5-FU) (A and C), docetaxel (E and G), and doxorubicin (I and K), used at the indicated doses in combination with A-1331852. (B, D, F, H, J and L) Percent cell viability, as measured using XTT, and calculated dose-response curves in cells cultured in the presence of the indicated concentrations of the two molecules for 72 hours. Results for UMRC-2 (A, B, E, F, I and J) and OSRC2 (C, D, G, H, K, and L) were calculated from  $\geq 3$  biological replicates. Error bars represent mean $\pm$ SD.

**Fig. S3. Transcriptional Determinants of A-1331852 Response.** (A) Pearson correlation coefficient of BCL-X<sub>L</sub> dependency, as indicated by the DEMETER2 score, and *BCL2L1* mRNA expression, as measured by RNA-Seq. Cells, which were used in the Achilles dependency analysis (described in **Fig. 1**) were annotated by lineage. (B to E) Immunoblot analysis (B), densitometric quantification using ImageJ (C and D), and statistical analysis of the ratio of BCL-X<sub>L</sub>:BCL-2 abundance (E), in the indicated ccRCC cells, which were annotated as “Sensitive”, “Intermediate”, or “Insensitive” based on their response to acute BCL-X<sub>L</sub> inhibition (described in Fig. 2 and fig. S2). In (E), ns = not significant. (F) Immunoblot analysis of the indicated ccRCC cells that were treated with either 1  $\mu$ M ATRA or 10 ng/ml TGF $\beta$  for 3 days, and normal mouse kidney tissue (Kidney). MCF7 cells, which are known to express the BCL-X<sub>S</sub> isoform are used as a positive

control. (G) mRNA expression levels, as measured using the RNA-Seq data described in Fig. 3, for the indicated BCL-2 related genes. Black arrows highlight genes whose mRNA levels are elevated in the sensitive (A498 and CAKI-2) cell lines compared to the insensitive (UMRC-2 and OSRC2) cells. (H to J) Volcano plots showing significant greater transcriptional response in the sensitive (CAKI-2 and A498) cells, compared to the A-1331852 insensitive (UMRC-2 and OSRC2) cell lines (H), gene-set enrichment analysis of the A-1331852 responsive gene-sets in the sensitive lines (I), and heatmap showing the most significantly altered genes in the sensitive cells (J), upon treatment with A-1331852 for 6-16 hours.

**Fig. S4. Contribution of the ccRCC's Genetic Hallmarks in A-1331852 Response.**

(A) Annotated genotypes of the indicated cell lines, as described in the Broad Institute's Cancer Cell Line Encyclopedia. (B) Immunoblot analysis in the indicated ccRCC cells, which were annotated as "Sensitive", "Intermediate", or "Insensitive" based on their response to acute BCL-X<sub>L</sub> inhibition (described in Fig. 2 and fig. S2), after treatment with Doxorubicin for 6 hours. (C to E) Immunoblot analysis (C) and cell viability, as measured in 786O cells (D) and OSRC2 cells (E) that were edited using CRISPR/Cas9 to knockout endogenous p53 and then lentivirally transduced with sgRNA-resistant versions of either wild-type p53, R248W mutant p53, or empty vector control (EV), and then treated with the indicated doses (presented as log<sub>10</sub>) of A-1331852 for 3 days. (F) Mutation status of the indicated genes, as described in the Broad Institute's Cancer Cell Line Encyclopedia. (\*) Historically, 786O was described as a wild-type p53 cell line; however, recently some laboratories have described a clone with mutant p53. The Kaelin laboratory archives,

which was the source of the 786O cells in this study, maintains the original p53-proficient clone. **(G to J)** Immunoblots **(G)**, CD44 expression, as measured by flow cytometry **(H)**, and percent cell death, relative to DMSO-treated control cells, in cell lines that were treated with ABT-263 **(I)** or A-1331852 **(J)**, as indicated, for 3 days. Cell proliferation was determined using XTT in the indicated ccRCC lines that were lentivirally transduced to express pVHL (VHL) or empty vector (Vector). In **(I)** and **(J)**, data represents mean $\pm$ S.D, n = 3.

**Fig. S5. Principal Component Analysis Predicts a BCL-X<sub>L</sub> Dependent Signature in Human ccRCC Tumors.** **(A to C)** Eigenvalues **(A)**, K-means clustering **(B)**, and Principal component analysis **(C)** of the entire kidney cancer gene expression dataset mined from TCGA, showing segregation into 3 principal clusters, driven by disease subtype. **(D to F)** Eigenvalues **(D)**, K-means clustering **(E)**, and Principal component analysis **(F)** of gene expression data from clear cell Renal Cell Carcinomas (KIRC in TCGA) overlaid with the differential gene signature (described in Fig. 4) to identify 3 principal clusters within ccRCC. As shown in **(F)**, two of these clusters represent ccRCCs that resemble cellular signatures of Bcl-xL inhibitor sensitive (red) and insensitive (blue) cells. The third cluster represents (likely misannotated) KIRCs that resemble chromophobe tumors in gene expression patterns (dark grey in **F**).

**Fig. S6. Kinetics of Cytotoxicity in Response to BCL-X<sub>L</sub> Inhibition in ccRCC cells.**

(A and B) Crystal violet staining (A) and Cell viability, as determined by cell counts (B), of A-498 following culture in the presence of the indicated concentration of A-1331852 for the indicated times. (C and D) Crystal violet staining (C) and Cell viability, as determined by cell counts (D), of UMRC-2 cells following culture in the presence of the indicated concentration of A-1331852 for the indicated times. In (B) and (D), cells were counted every using the automated ViCell counter (Beckman) and replated in the presence of fresh drug every 3 days.

**Fig. S7. Characterization of splenomegaly in A-1331852-treated animals.**

(A) Mean body weight of enrolled mice over the duration of A-1331852 treatment (25 mg/kg, twice a day, Oral gavage). (B) Photographs of representative tumor-bearing mice following 4-weeks of twice daily administration of 25 mg/kg A-1331852 or sham-vehicle control. Black arrow indicates the enlarged spleen in the A-1331852 treated mouse. (C and D) H&E stains of spleens recovered from either sham-vehicle control (C) or A-1331852 (D) treated mice, as indicated.

**Fig. S8. Histological characterization of the impact of A-1331852 treatment.**

Histological analysis of H&E stained sections of kidney (A and B), liver (C and D), lung (E and F), and heart (G and H) that were recovered from mice following 4-weeks of twice daily administration of 25 mg/kg A-1331852 or sham-vehicle control, as indicated.

A

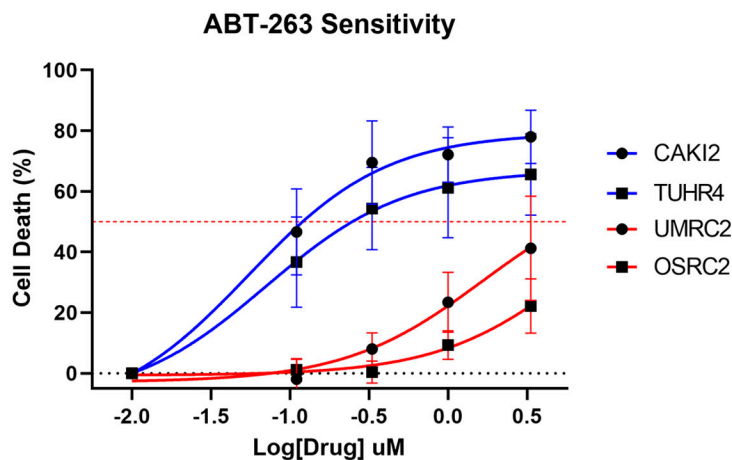

B

| Cell Line | $\text{IC}_{50}$ ( $\mu\text{M}$ ) |
|-----------|------------------------------------|
| CAKI2     | 0.05450                            |
| TUHR4     | 0.07065                            |
| UMRC2     | 1.629                              |
| OSRC2     | 6.457                              |

C

| Cell Line | A-1331852 $\text{IC}_{50}$ [ $\mu\text{M}$ ] |
|-----------|----------------------------------------------|
| CAKI2     | 0.00069                                      |
| A498      | 0.0021                                       |
| TUHR4     | 0.017                                        |
| SLR23     | 0.012                                        |
| 786O      | ND                                           |
| UMRC6     | ND                                           |
| UMRC2     | ND                                           |
| UOK101    | ND                                           |
| OSRC2     | ND                                           |
| RCC4      | ND                                           |

D

| Cell Line | ABT-199 $\text{IC}_{50}$ [ $\mu\text{M}$ ] |
|-----------|--------------------------------------------|
| SUDHL-6   | 0.063                                      |
| CAKI2     | ND                                         |
| A498      | ND                                         |
| TUHR4     | ND                                         |
| SLR23     | ND                                         |
| 786O      | ND                                         |
| UMRC6     | ND                                         |
| UMRC2     | ND                                         |
| UOK101    | ND                                         |
| OSRC2     | ND                                         |
| RCC4      | ND                                         |

E

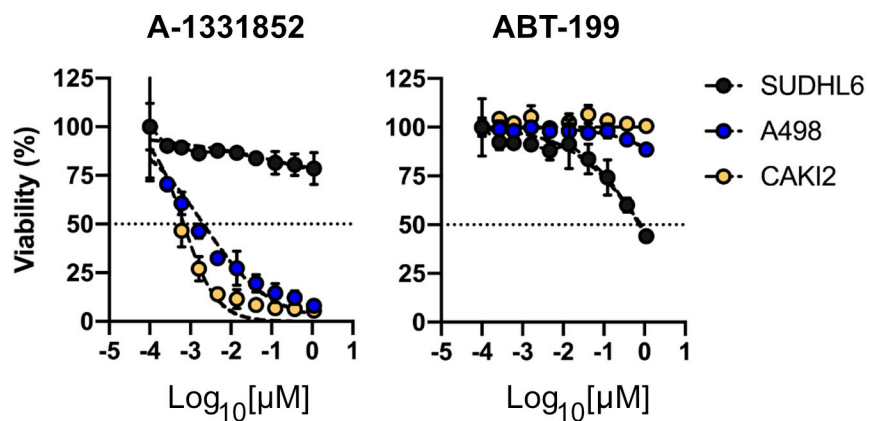

F

A-1331852 in the BCL-X<sub>L</sub> binding pocket

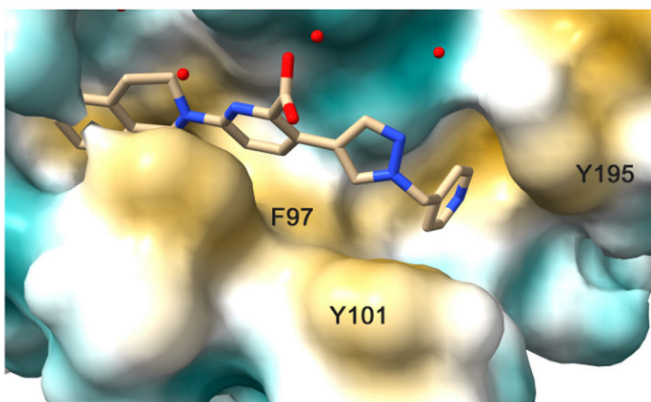

G

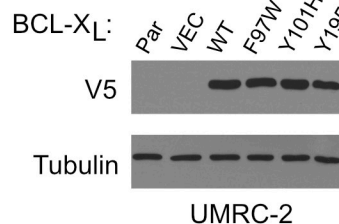

H

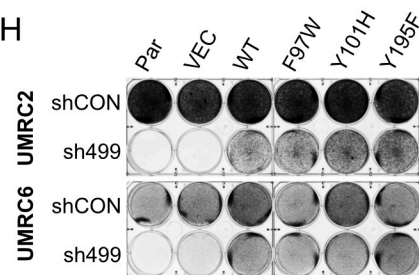

I

| BCL-X <sub>L</sub> | $\text{IC}_{50}$ ( $\mu\text{M}$ ) |
|--------------------|------------------------------------|
| VEC                | 1.95                               |
| WT                 | 1.52                               |
| F97W               | 9.01                               |
| Y101H              | 0.32                               |
| Y195F              | 3.84                               |

J

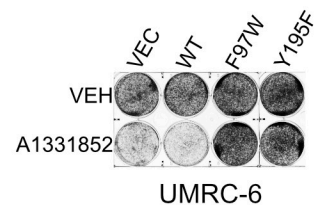

**FIGURE S2**
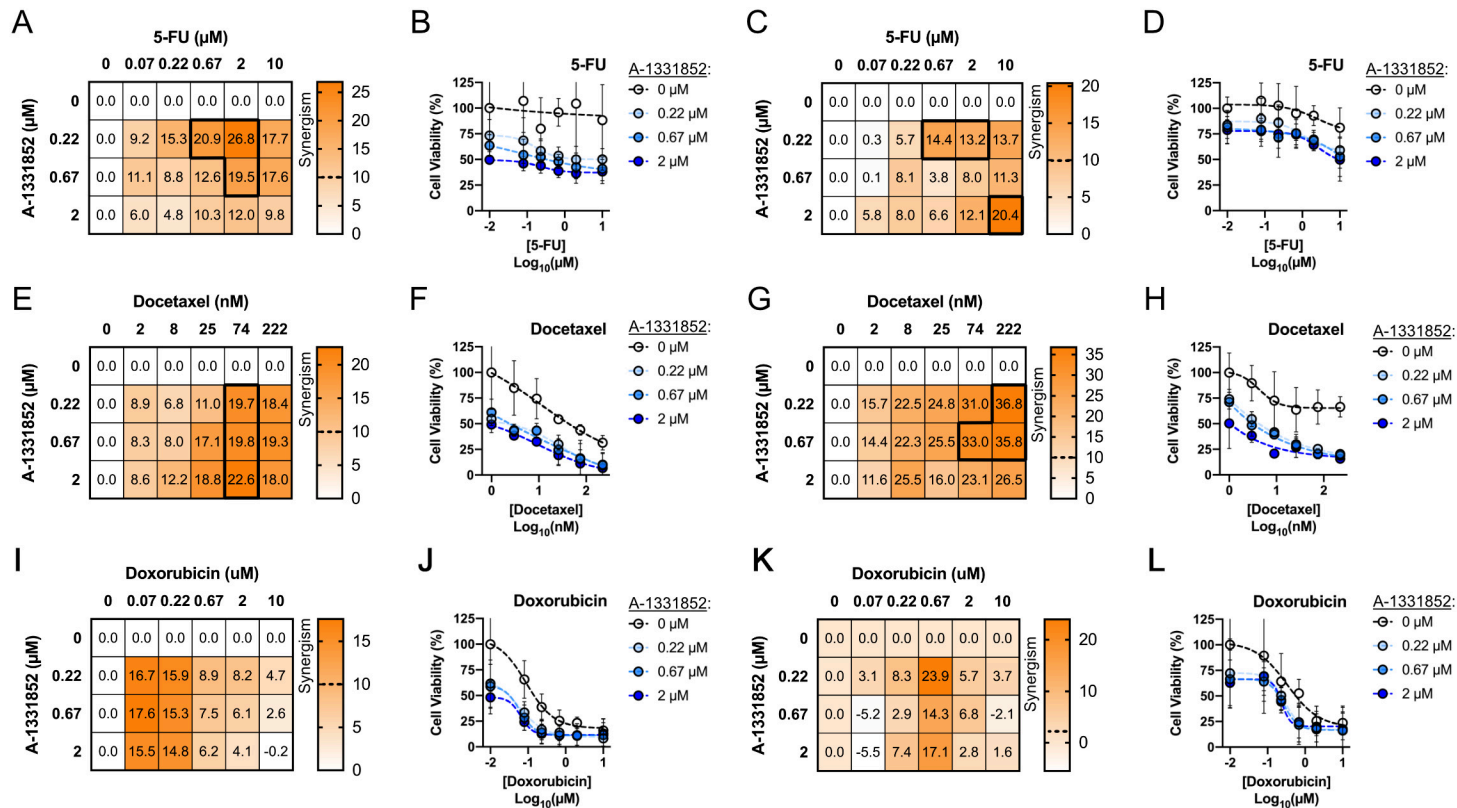

FIGURE S3

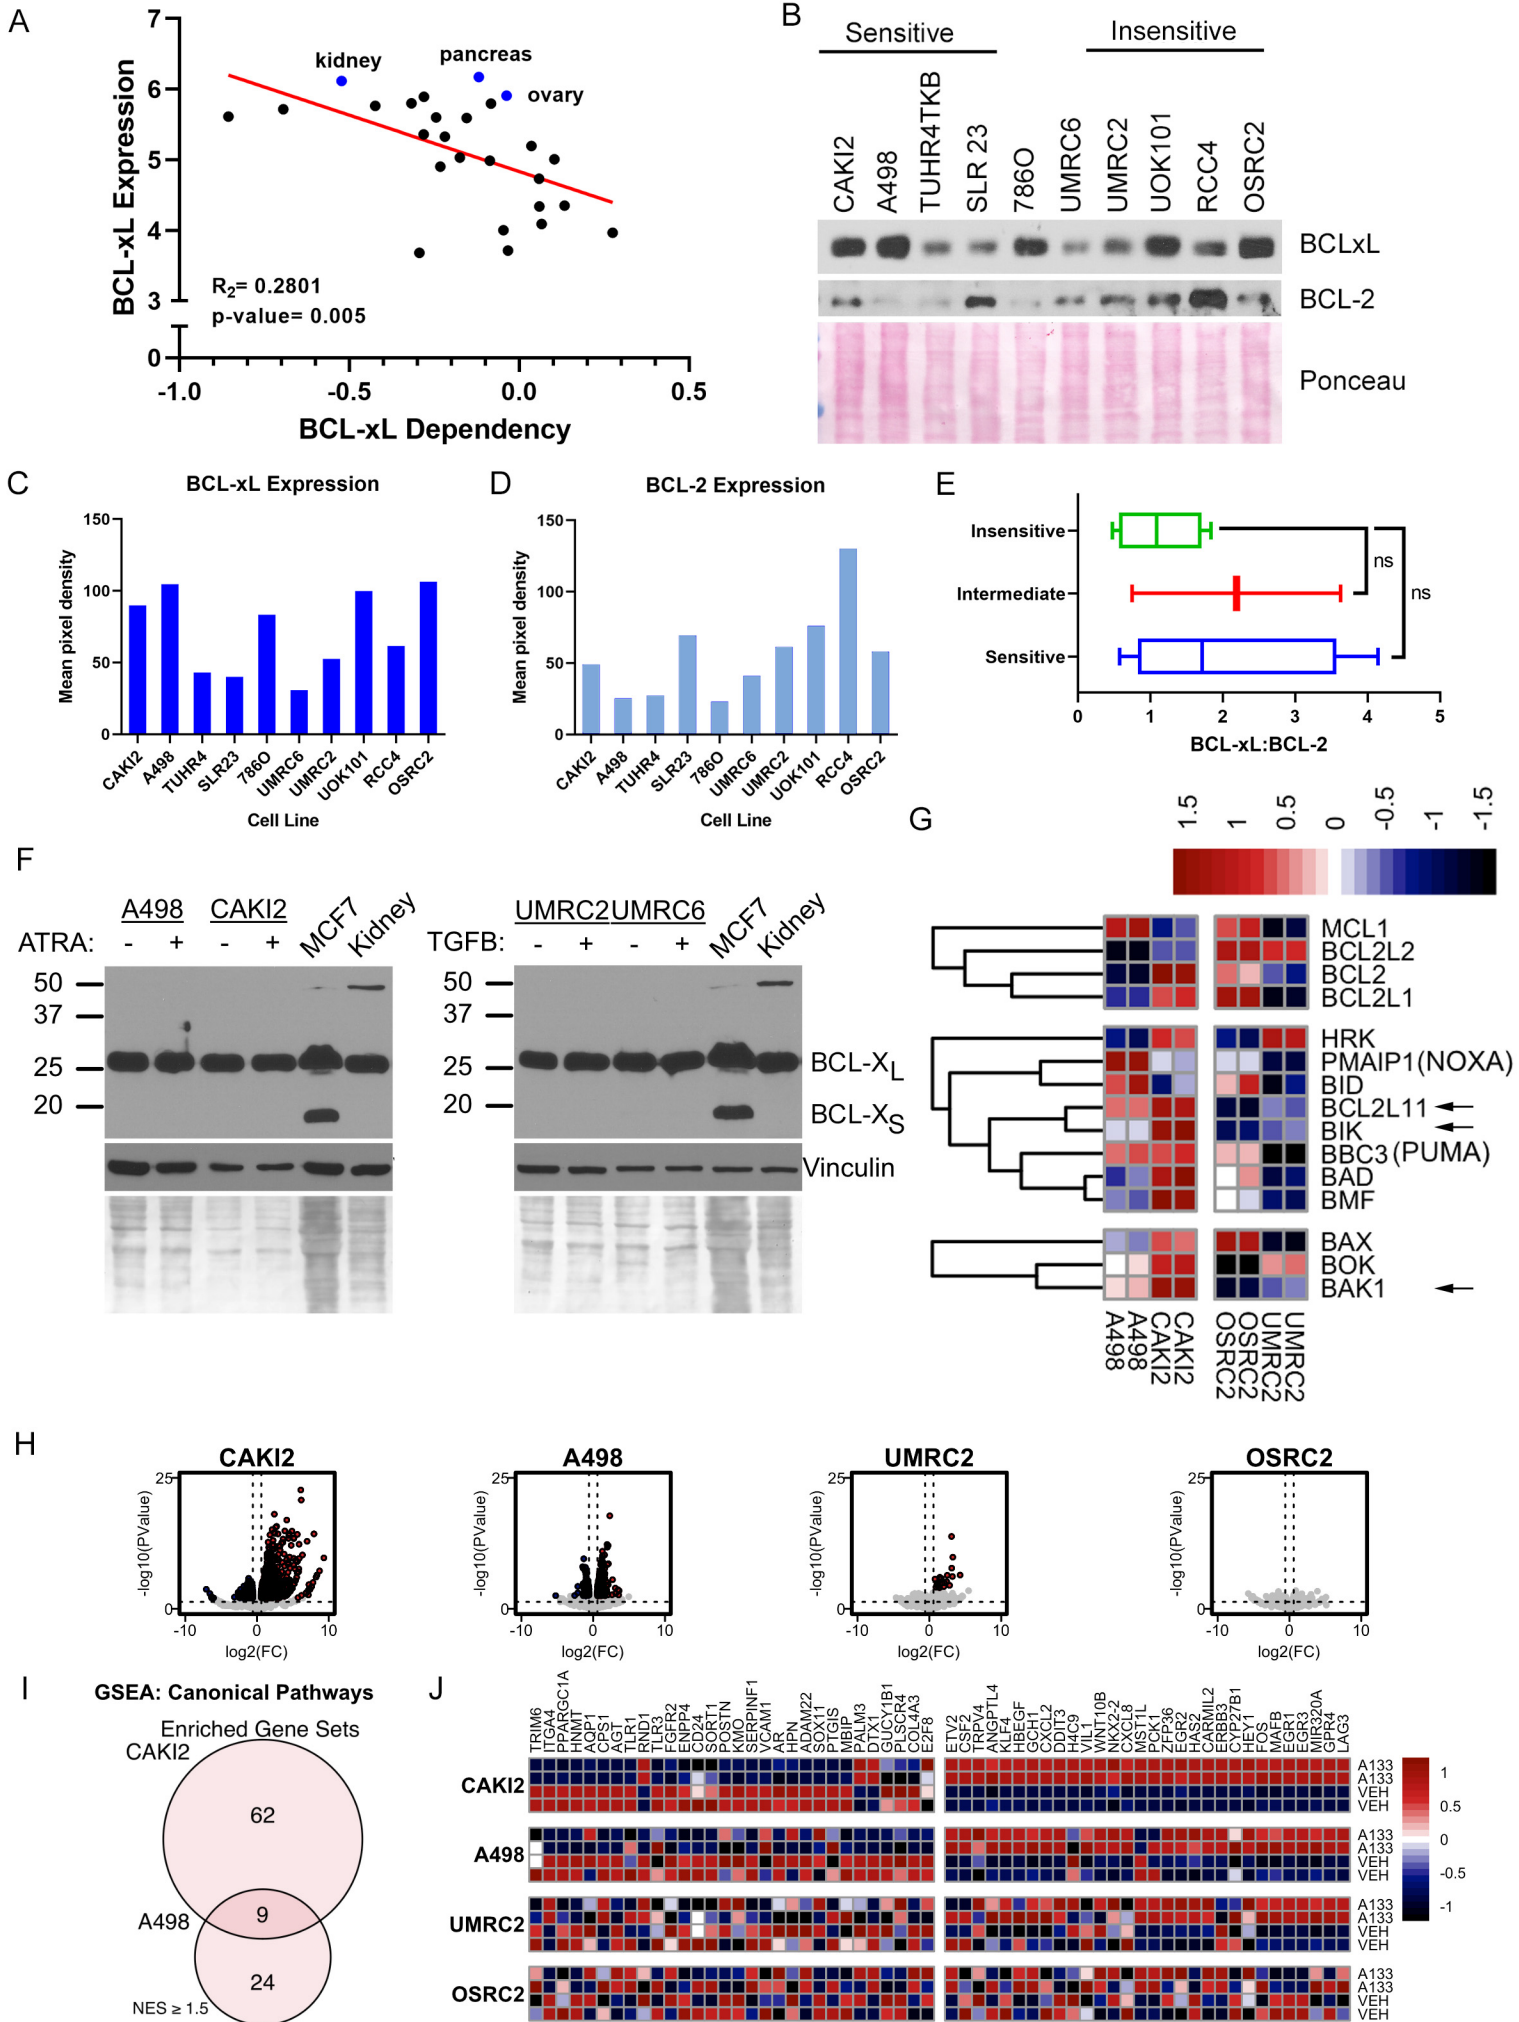



**FIGURE S4**
**A**

|          | BCL-xL dep. | TP53        | VHL     |
|----------|-------------|-------------|---------|
| CAK12    | HIGH        | Wild-type   | R177*   |
| A498     | HIGH        | Wild-type   | VD142fs |
| TUHR4TKB | HIGH        | Wild-type   | Y98fs   |
| SLR23    | HIGH        | R158H       | W88*    |
| 786O     | INTERMED.   | R248W       | G104fs  |
|          |             | R278A       |         |
|          |             | Splice Site |         |
| UMRC6    | INTERMED.   |             |         |
| UOK101   | LOW         | Wild Type   | T157fs  |
| RCC4RGB  | LOW         |             |         |
| UMRC2    | LOW         |             |         |
| OSRC2    | LOW         | Wild Type   | R58fs   |

**B**
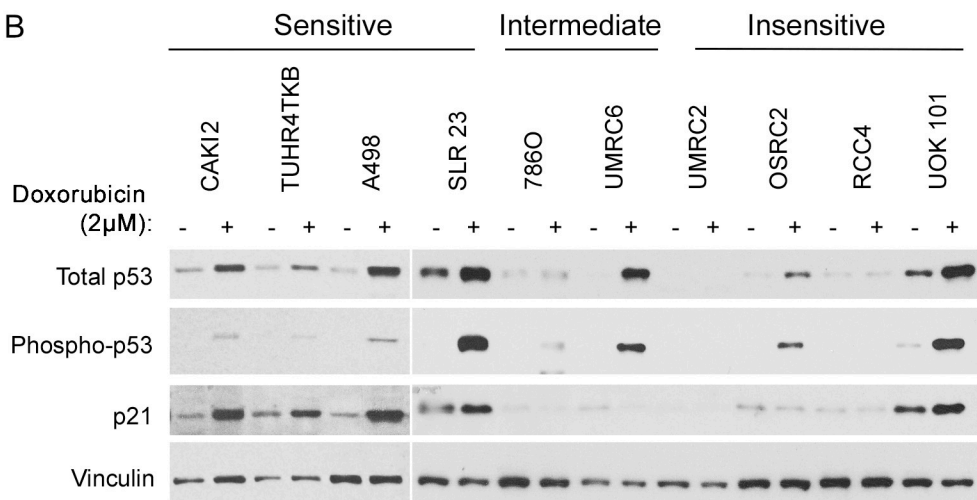
**C**
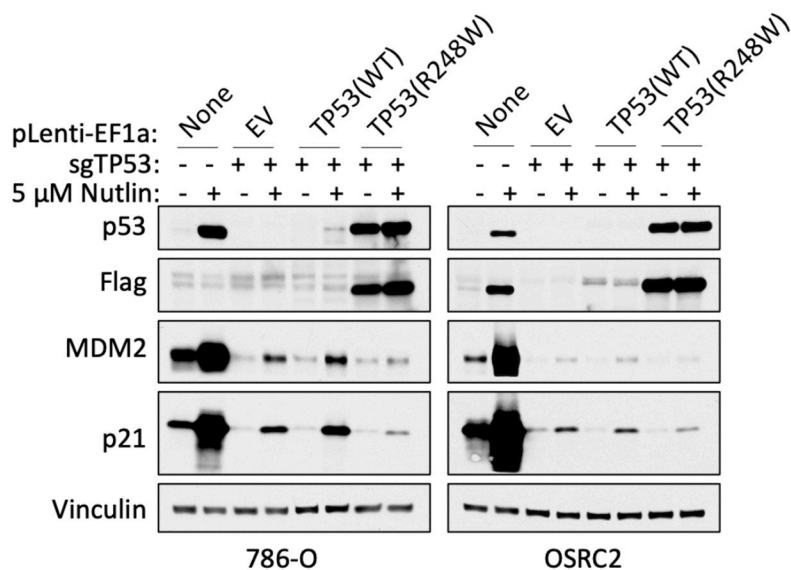
**D**
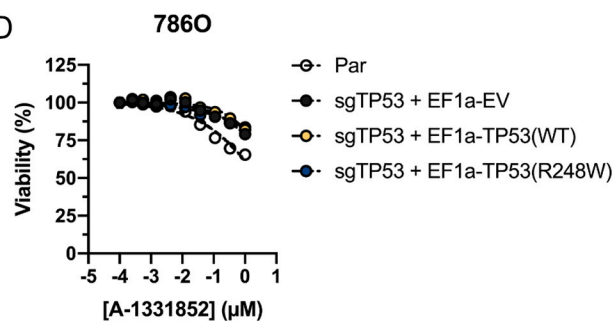
**E**
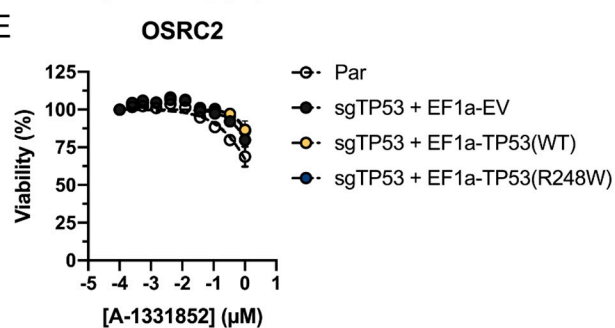
**F**
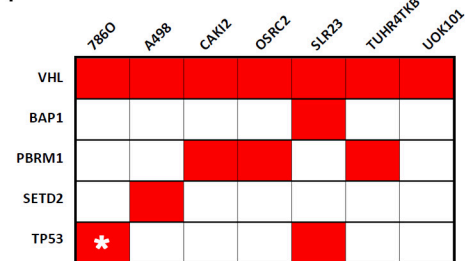
**G**
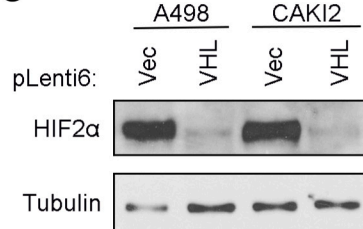
**H**
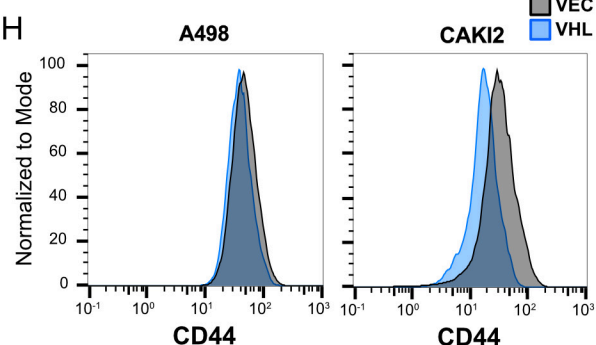
**I**
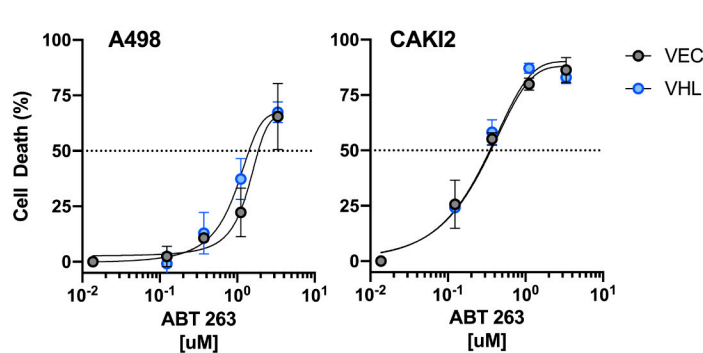
**J**
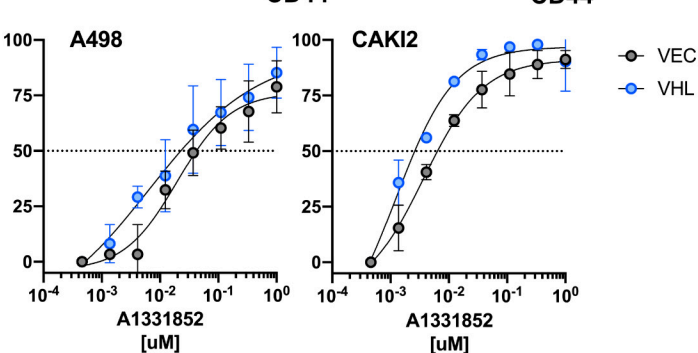

FIGURE S5

A

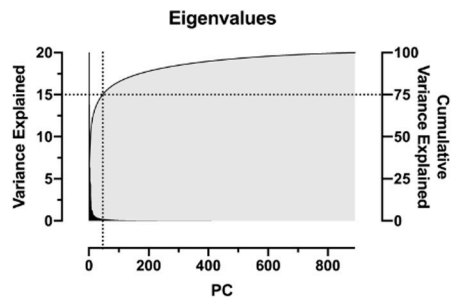

B

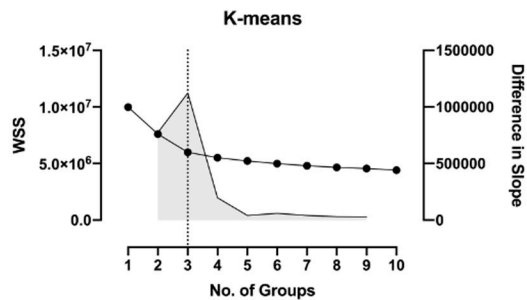

D

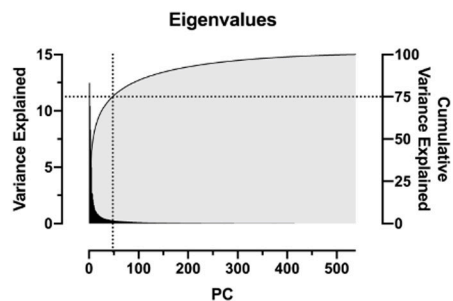

E

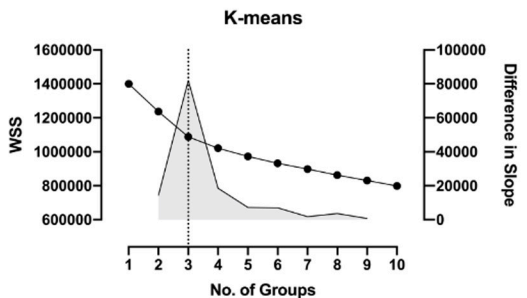

C

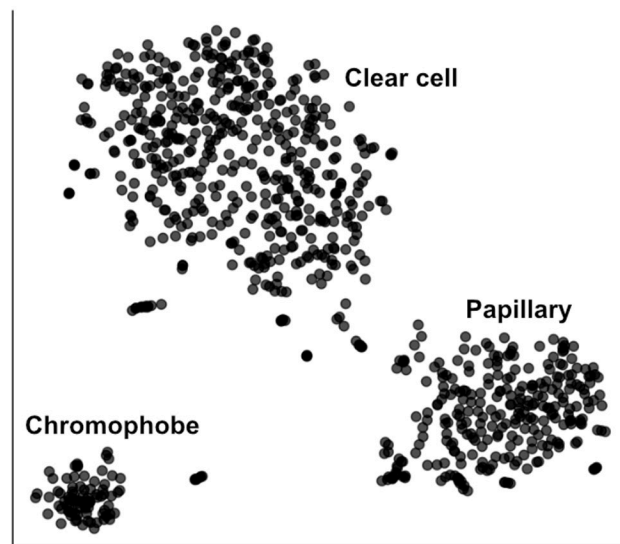

F

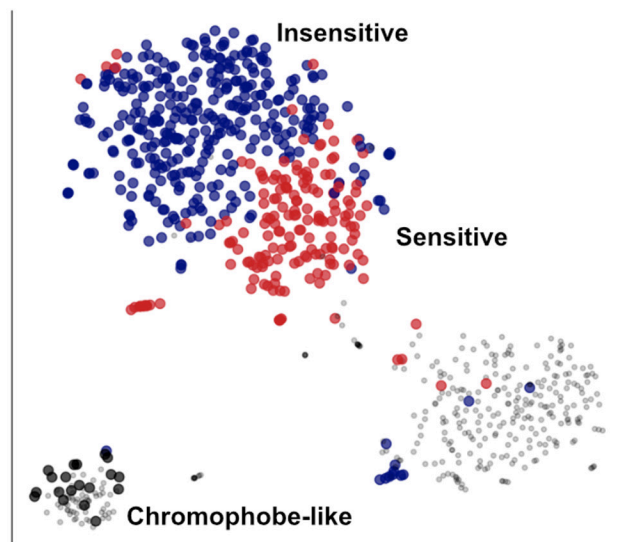

FIGURE S6

A

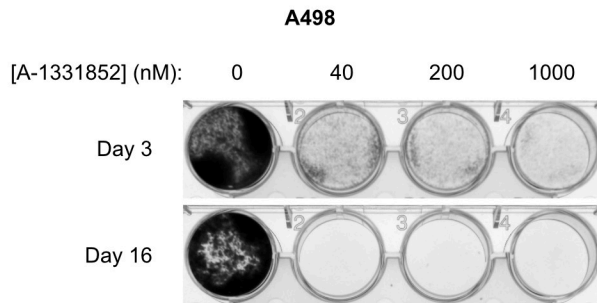

B

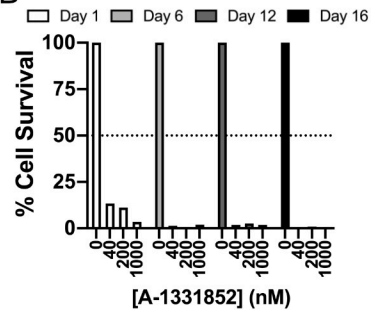

C

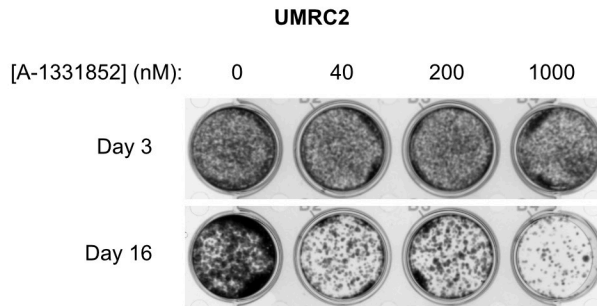

D

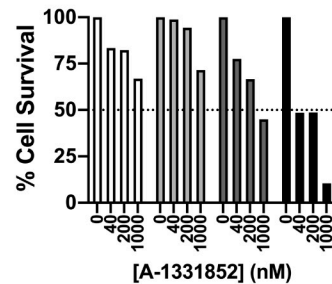

FIGURE S7

A

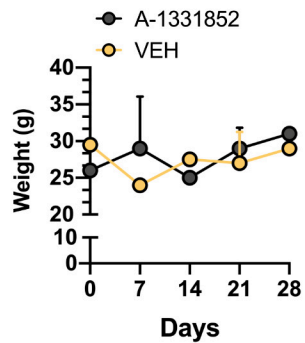

B

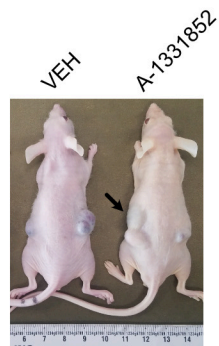

C

(H&E) Veh: Spleen

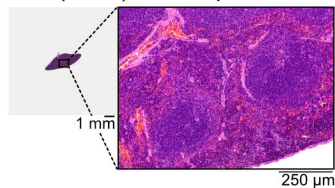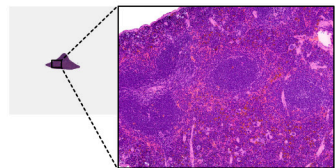

D

(H&E) A-1331852: Spleen

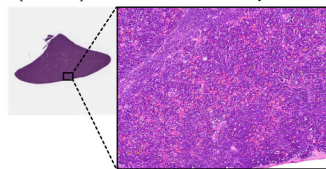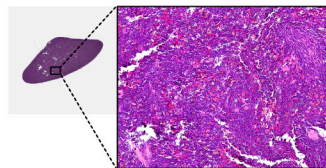

FIGURE S8

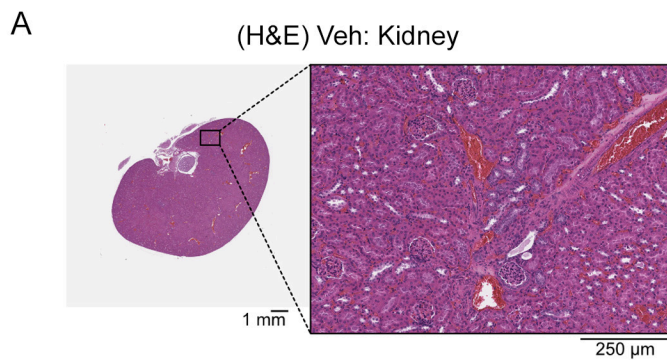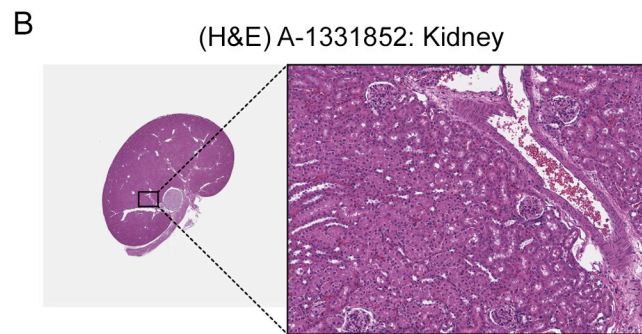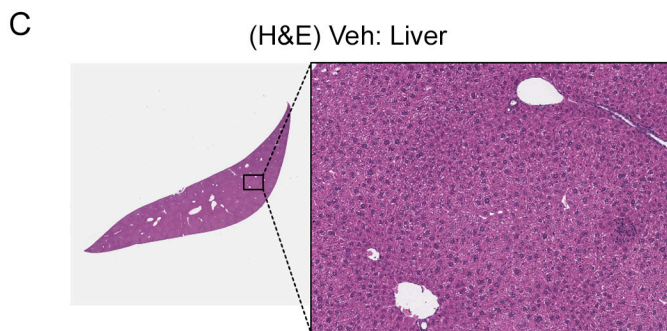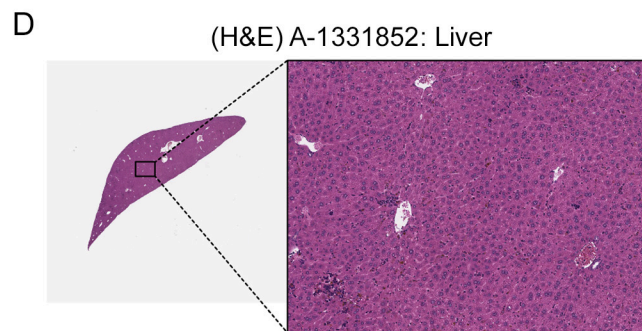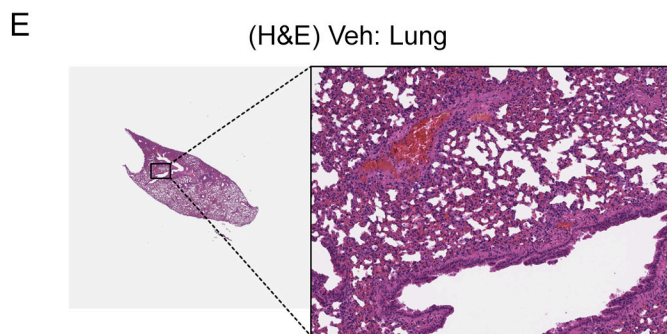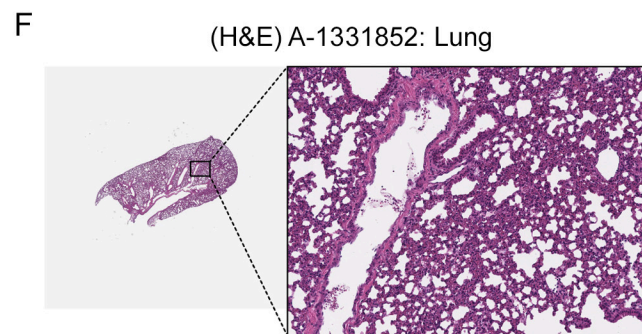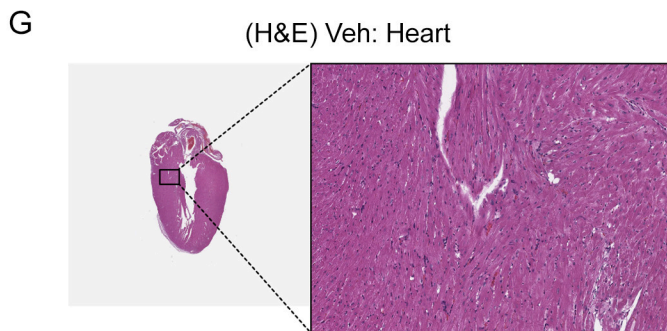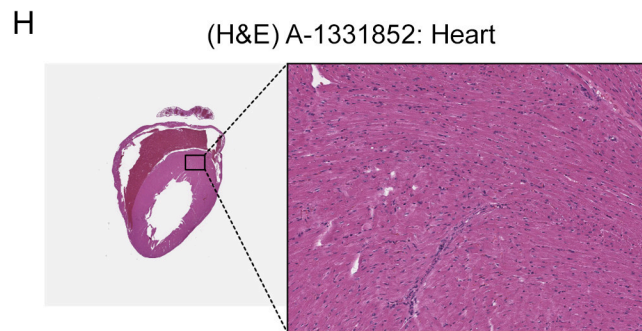

Supplement: NIHMS1821904-supplement-1.pdf [file NIHMS1821904-supplement-1.pdf]
